# Supplementary material
Source: PubMed Central journal article supplement (PMC11422951)
Supplement: media-2.pdf [file media-2.pdf]

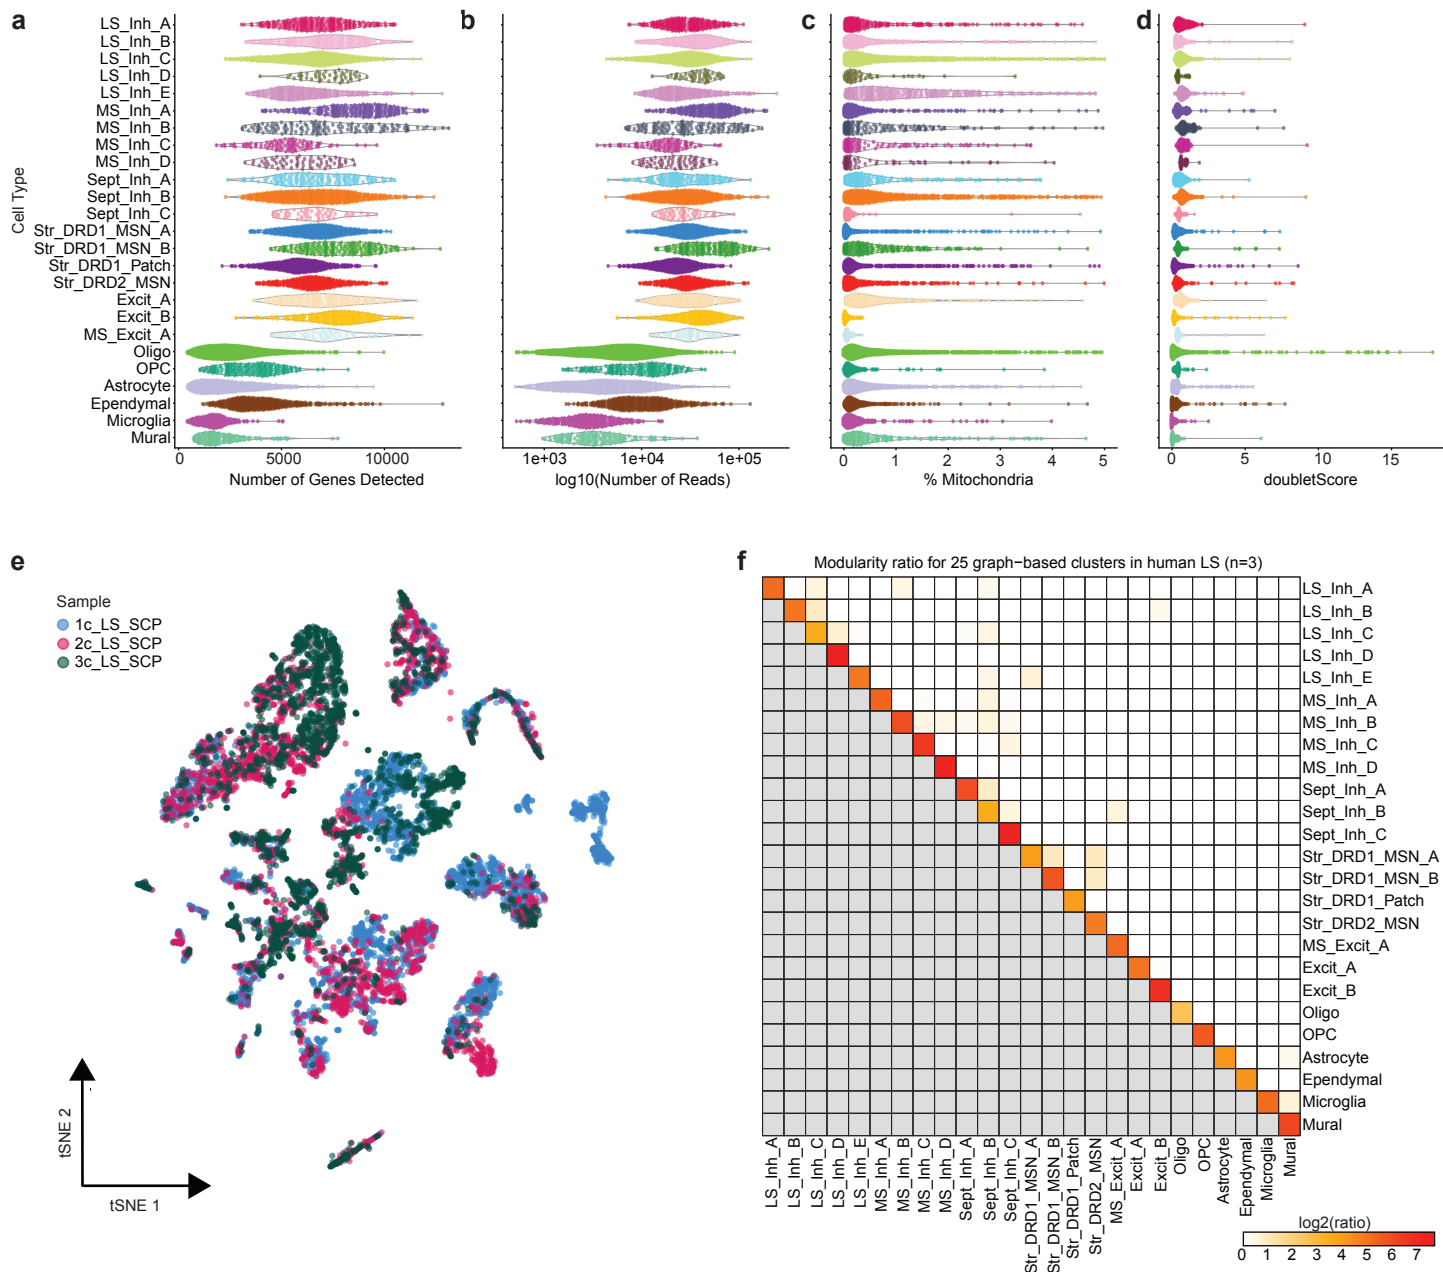

**Figure S2.** Cluster and nuclei quality control. Violin plots of various quality control metrics such as **a**, number of genes detected **b**, number of reads **c**, percent of reads mapping to the mitochondrial genome and **d**, doublet score. **e**, t-SNE with nuclei colored by donor/sample. **f**, Heatmap of pairwise modularity scores for 25 clusters from human LS single nucleus RNA-sequencing.
