# Supplementary material
Source: PubMed Central journal article supplement (PMC11422951)
Supplement: media-3.pdf [file media-3.pdf]

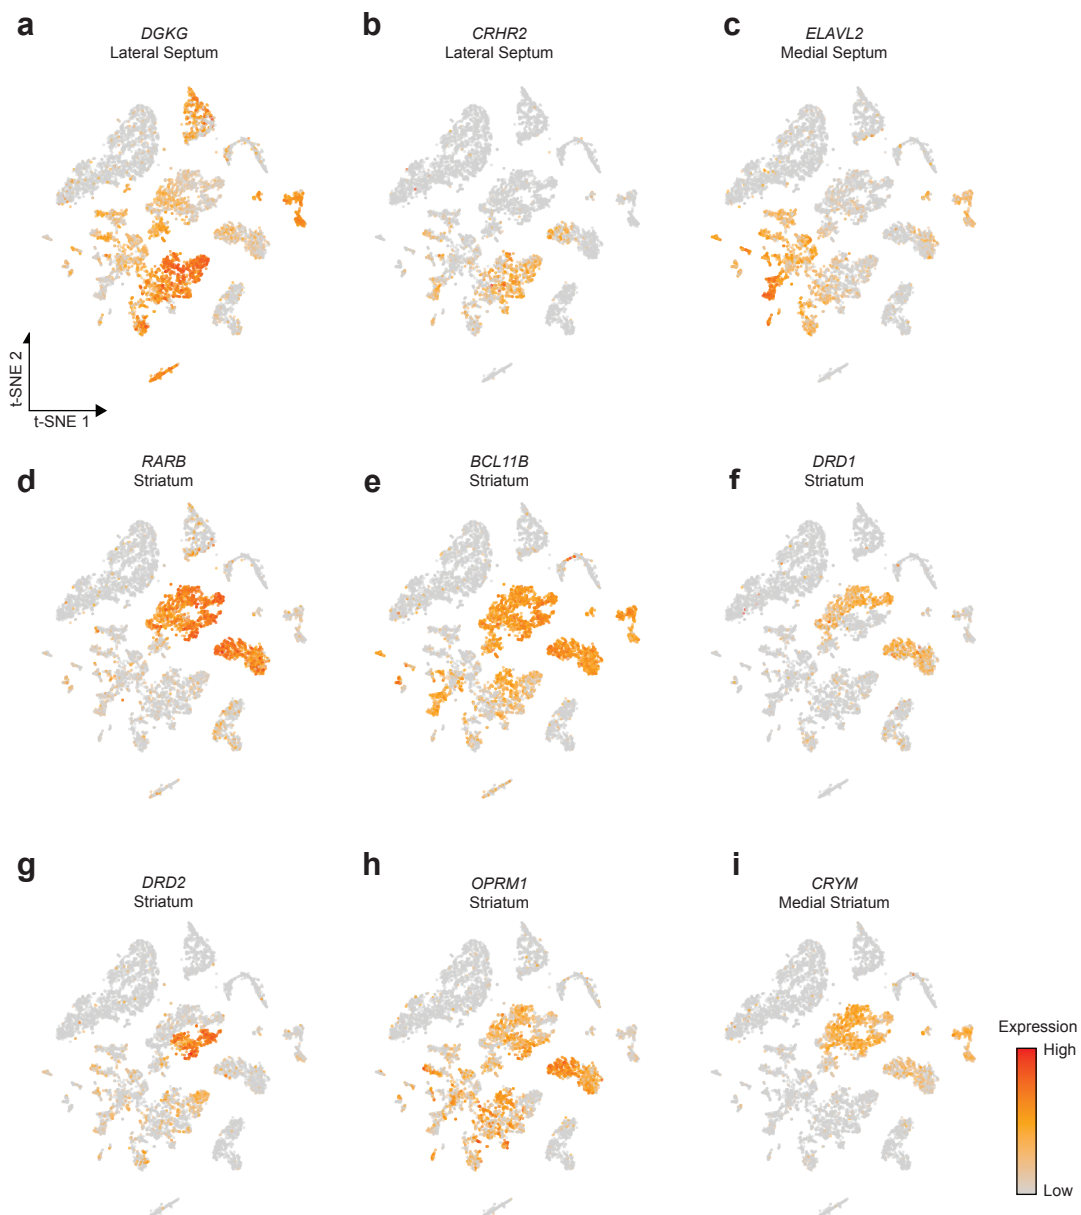

**Figure S3.** Distribution of expression of septal and striatal marker genes. Feature plots for **a**, *DGKG*, **b**, *CRHR2*, **c**, *ELAVL2*, **d**, *RARB*, **e**, *BCL11B*, **f**, *DRD1*, **g**, *DRD2*, **h**, *OPRM1*, **i**, *CRYM*. Titles include gene name and brain region where gene is most highly expressed.
