# Supplementary material
Source: PubMed Central journal article supplement (PMC11422951)
Supplement: media-4.pdf [file media-4.pdf]

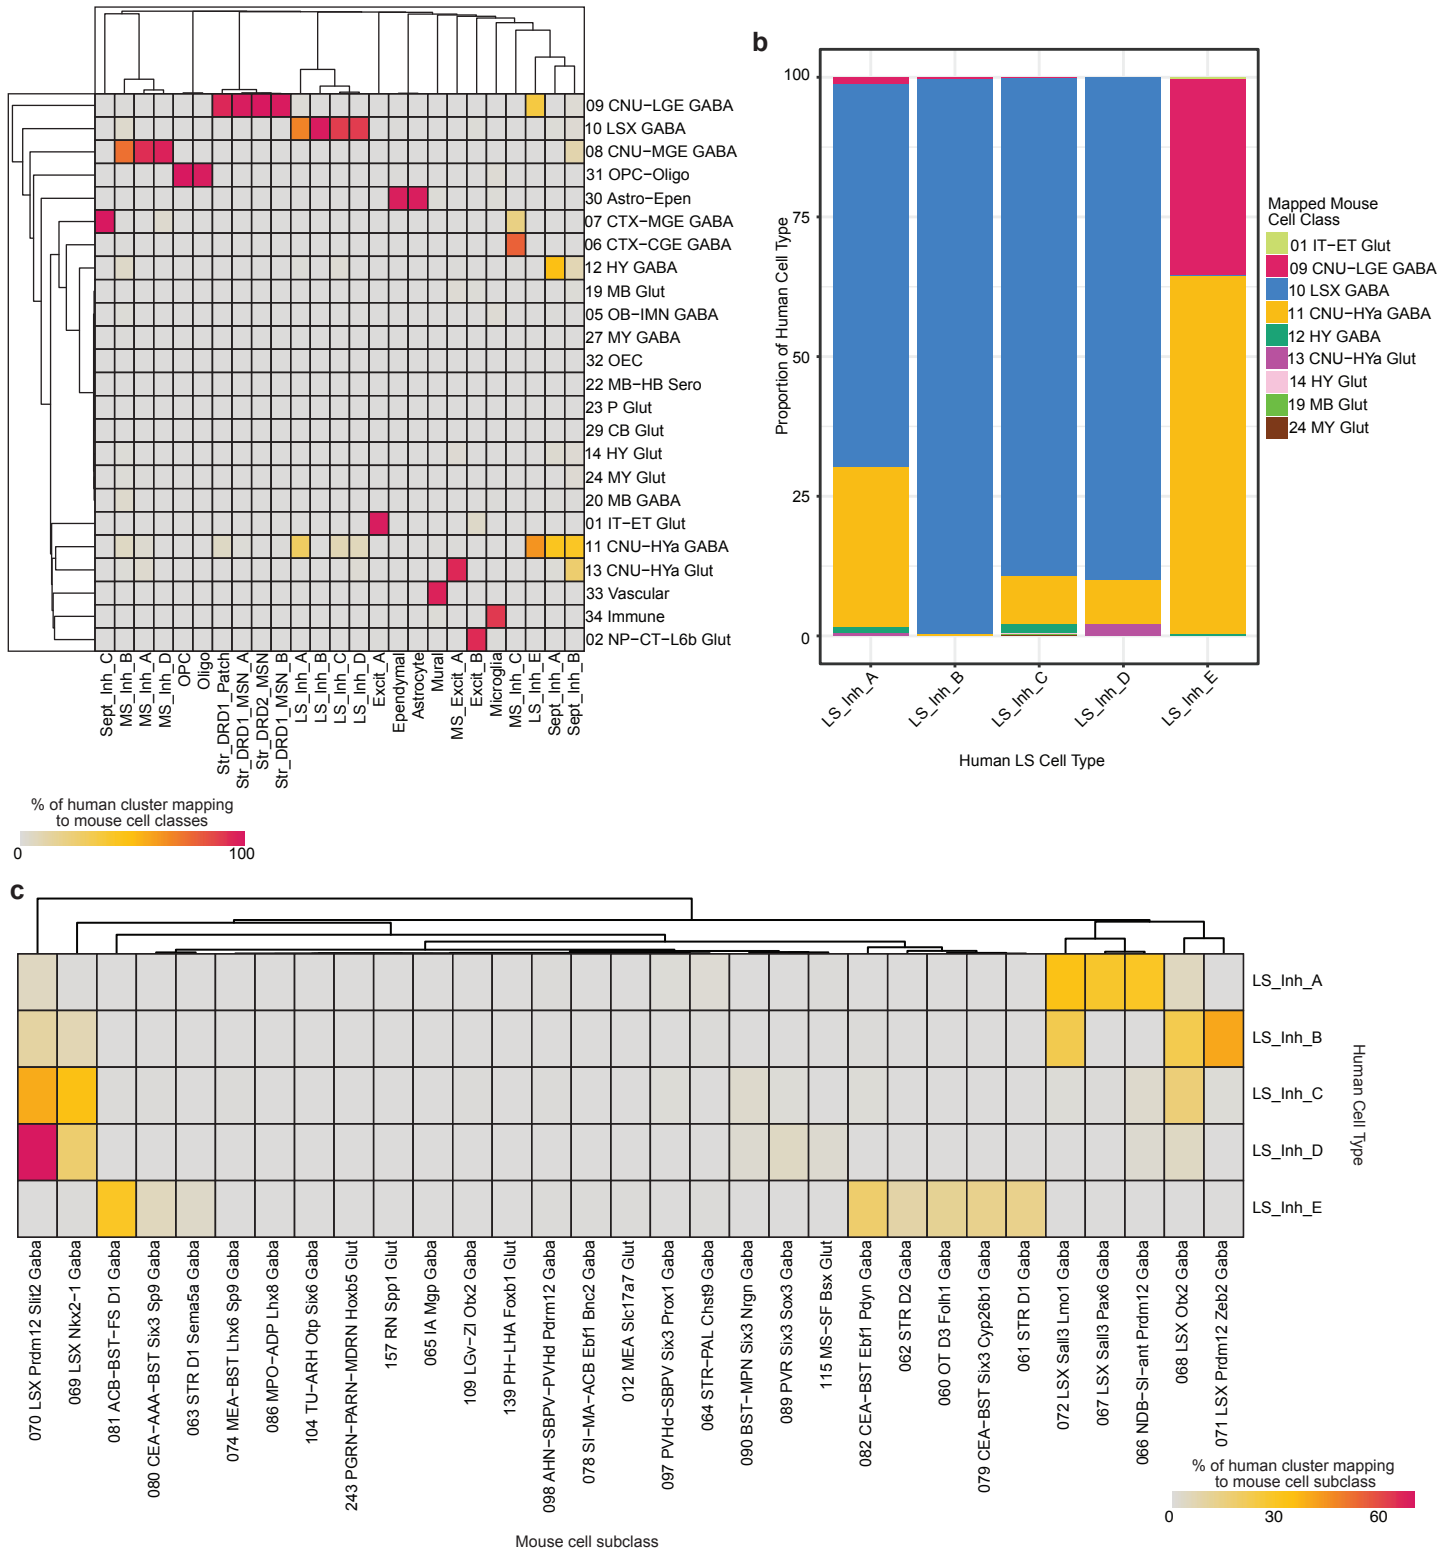

**Figure S4.** Cross-species analysis with MapMyCells. **a**, Heatmap of the percentage of each human cell cluster mapping to broad mouse cell classes. **b**, Barplot for the proportion of each human LS neuronal cell type mapping to broad mouse cell classes. **c**, Heatmap of the percentage of each human LS neuronal cell type mapping to mouse subclasses.
